# Supplementary material
Source: PubMed Central journal article supplement (PMC7086403)
Supplement: NIHMS1546131-supplement-2.pdf [file NIHMS1546131-supplement-2.pdf]

|  |  |  |  |  |
|--|--|--|--|--|
|  |  |  |  |  |
|--|--|--|--|--|

## SOURCES AND CONTENT OF INFORMATION *(continued)*

57. How important were the following types of health information **during** treatment?

|                                                               | Very Important        | Important             | Somewhat Important    | Of Little Importance  | Unimportant           | Don't Know / Not Applicable |
|---------------------------------------------------------------|-----------------------|-----------------------|-----------------------|-----------------------|-----------------------|-----------------------------|
| a. Possible symptoms                                          | <input type="radio"/>       |
| b. Possible side-effects                                      | <input type="radio"/>       |
| c. Pain related to disease or treatment                       | <input type="radio"/>       |
| d. Information specific to your cancer diagnosis or treatment | <input type="radio"/>       |
| e. Prognosis                                                  | <input type="radio"/>       |
| f. Finances                                                   | <input type="radio"/>       |
| g. Cancer reoccurrence                                        | <input type="radio"/>       |
| h. Survival rate                                              | <input type="radio"/>       |

58. Rank in order the following resources, with 1 being the most important source of health information and 8 being the least important source of information:

- \_\_\_\_\_ Family
- \_\_\_\_\_ Friends
- \_\_\_\_\_ Health care team
- \_\_\_\_\_ Online resources
- \_\_\_\_\_ Other health care teams
- \_\_\_\_\_ Other patients
- \_\_\_\_\_ Social networks
- \_\_\_\_\_ Other resources *(please specify)*: \_\_\_\_\_

## DEMOGRAPHICS

59. Indicate your cancer site (*select only one*):

- Brain
- Breast
- Colon
- Head and Neck
- Lung
- Melanoma
- Prostate
- Ovary
- Sarcoma
- Other *(please specify)*: \_\_\_\_\_

|  |  |  |  |  |
|--|--|--|--|--|
|  |  |  |  |  |
|--|--|--|--|--|

**DEMOGRAPHICS** (continued)

60. How long have you been a patient at MD Anderson?

- Less Than 1 year
- 1 – 2 Years
- 3 – 5 Years
- 6 – 10 Years
- Over 10 Years

61. Indicate your gender:

- Female
- Male

62. Are you Hispanic or Latino?

- Yes
- No

63. Select **one or more** of the following races:

- American Indian or Alaska Native
- Asian
- Black or African American
- Native Hawaiian or Other Pacific Islander
- White
- Other (*please specify*): \_\_\_\_\_

64. Indicate your age range:

- Less Than 18 Years of Age
- 18 – 30 Years of Age
- 31 – 45 Years of Age
- 46 – 60 Years of Age
- Over 60 Years of Age

65. Indicate your 5-digit zip code:

|  |  |  |  |  |
|--|--|--|--|--|
|  |  |  |  |  |
|--|--|--|--|--|

66. Where did you receive the majority of your care?

- Main Campus
- Regional Care Centers
